# Supplementary material for: A type 2 cytokine axis for thymus emigration
Source: PubMed Central journal article supplement (PMC5551576; doi:10.1084/jem.20170271), 2017-08-07
Supplement: JEM_20170271_sm.pdf [file JEM_20170271_sm.pdf]

SUPPLEMENTAL MATERIAL

White et al., <https://doi.org/10.1084/jem.20170271>

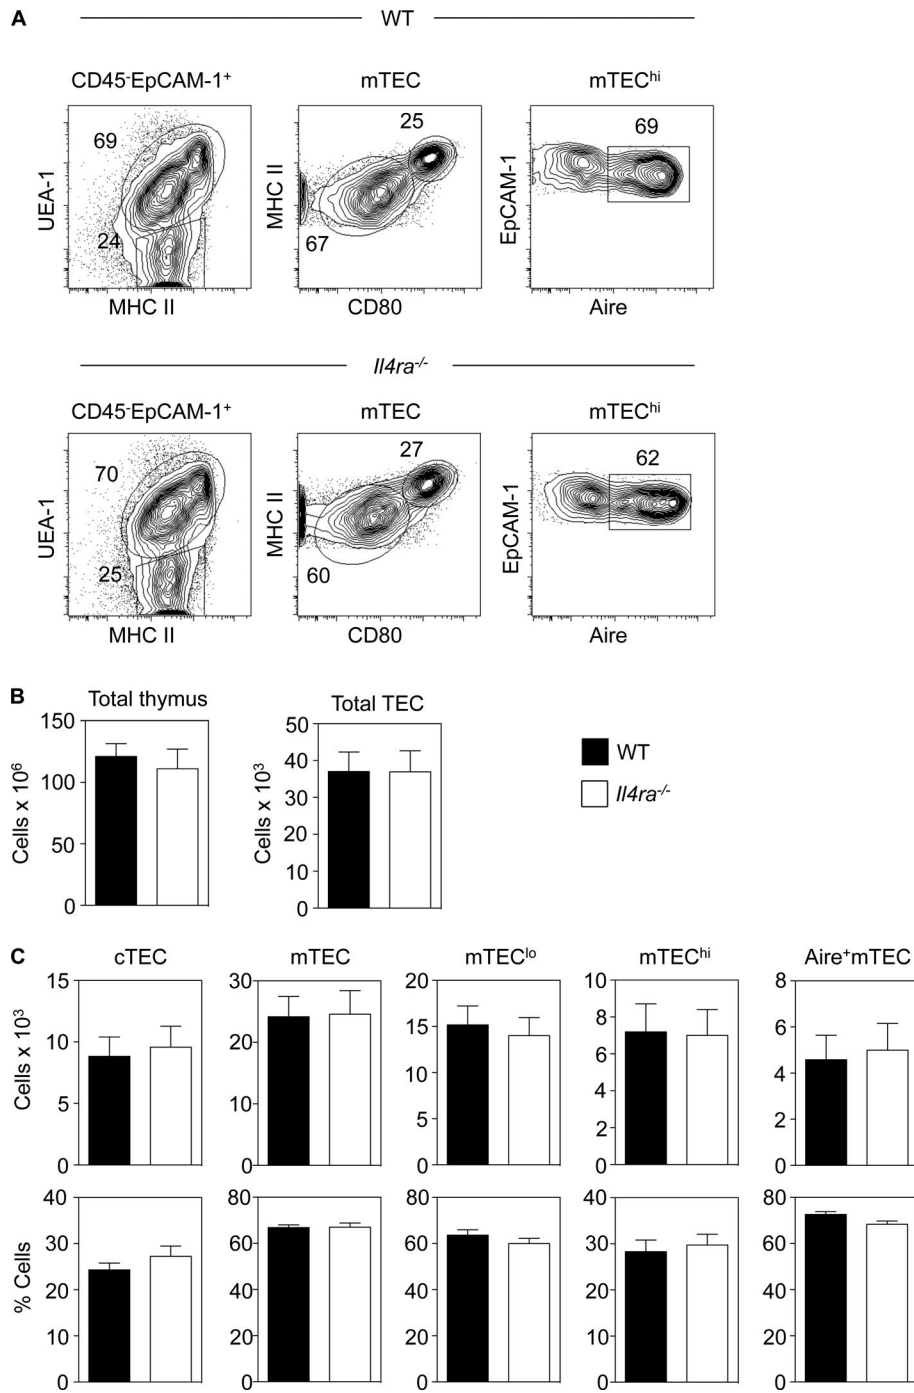

Figure S1. **TEC populations in *Il4ra*<sup>-/-</sup> mice.** (A) CD45-depleted thymic stromal preparations from WT (top) and *Il4ra*<sup>-/-</sup> (bottom) mice, after gating on EpCAM1<sup>+</sup> TEC. mTEC are identified as EpCAM1<sup>+</sup>MHCII<sup>+</sup>UEA1<sup>+</sup> cells and mTEC<sup>hi</sup> as EpCAM1<sup>+</sup>UEA1<sup>+</sup>MHCII<sup>hi</sup>CD80<sup>hi</sup> cells. (B) Total thymus cellularity after digestion and the total TECs. (C) Quantitative analysis of TEC populations identified in A. Data are typical of at least three separate experiments, where *n* = 9 for both WT and *Il4ra*<sup>-/-</sup> mice.

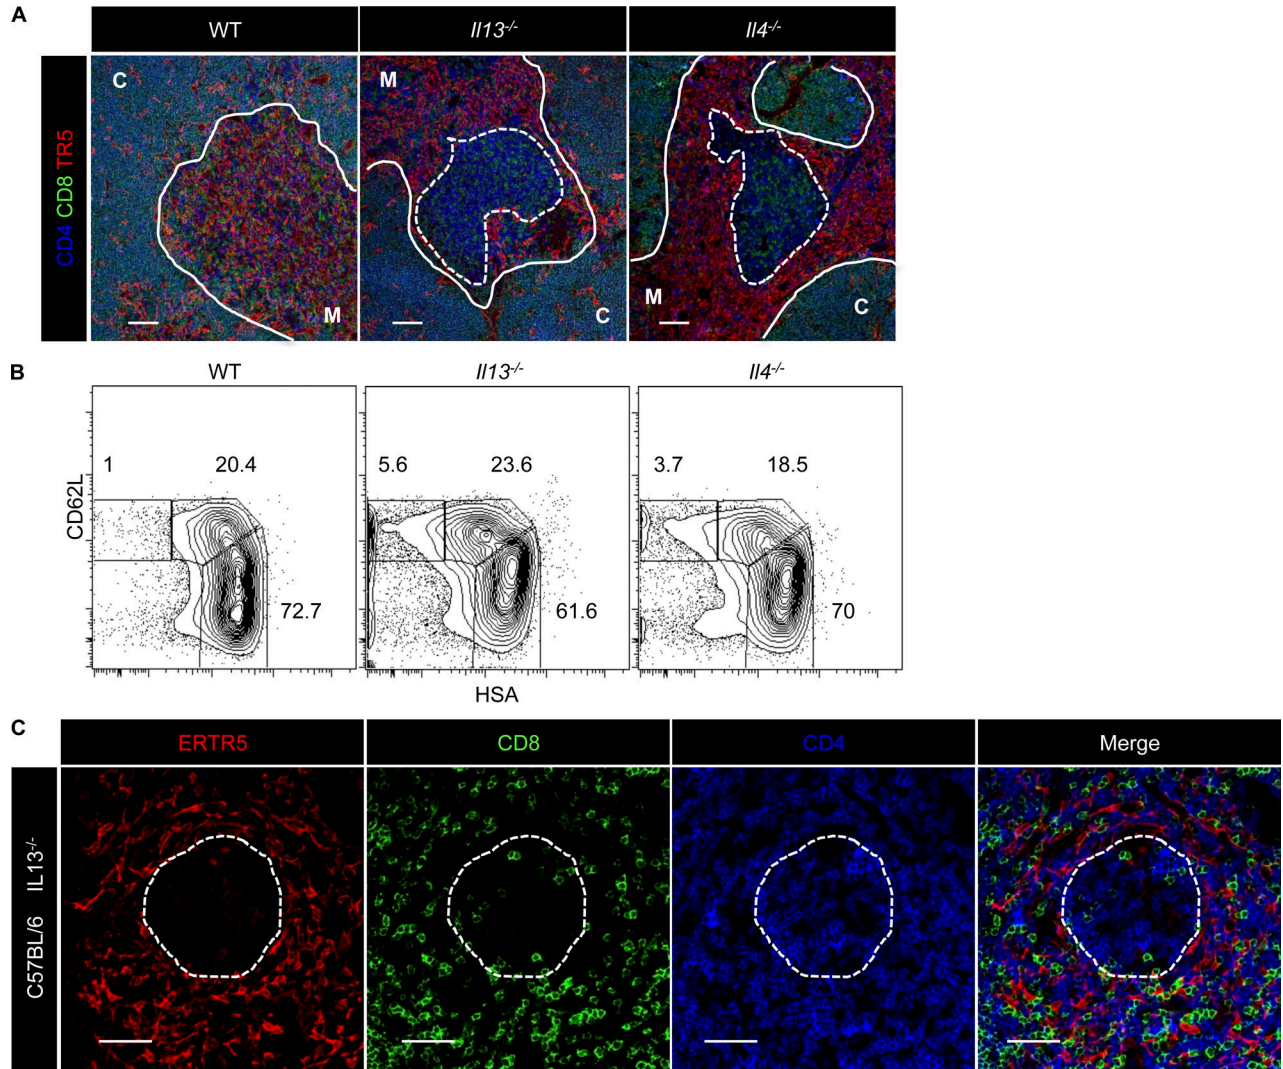

Figure S2. **Thymocyte accumulations in cytokine-deficient mice.** (A) Confocal images of frozen thymus sections of WT, *Il13<sup>-/-</sup>*, and *Il4<sup>-/-</sup>* mice on a BALB/c background. TR5 identifies mTEC (red), CD4 is in blue, and CD8 in green. Solid line denotes CMJ, dotted line denotes boundaries of SP thymocyte accumulations. Bars, 100  $\mu$ m. (B) CD62L/CD69 expression on SP4TCR $\beta$ <sup>+</sup> thymocytes from the indicated mouse strains. (C) Confocal images of a frozen thymus section of tissue from *Il13<sup>-/-</sup>* mice on a C57BL/6 background. ETR5 is used to identify mTEC (red), CD4 is in blue, and CD8 in green. Dotted lines denote boundary of SP thymocyte accumulations. Bars, 50  $\mu$ m. Data are typical of at least two separate experiments, where  $n = 3$  for WT and knockout strains.
